# Supplementary material for: How the OH reactivity affects the ozone production efficiency: case studies in Beijing and Heshan, China
Source: Copernicus journal article supplement (doi:10.5194/acp-17-7127-2017), 2017-06-15
Supplement: Supplementary file 1 [file acp-17-7127-2017-supplement.pdf]

Supplement of Atmos. Chem. Phys., 17, 7127–7142, 2017  
<https://doi.org/10.5194/acp-17-7127-2017-supplement>  
© Author(s) 2017. This work is distributed under  
the Creative Commons Attribution 3.0 License.

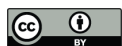

*Supplement of*

## **How the OH reactivity affects the ozone production efficiency: case studies in Beijing and Heshan, China**

**Yudong Yang et al.**

*Correspondence to:* Min Shao ([mshao@pku.edu.cn](mailto:mshao@pku.edu.cn))

The copyright of individual parts of the supplement might differ from the CC BY 3.0 License.

Table S1 Performance of major photochemical instruments used in summer 2013 in Beijing

| Parameter                    | Technique              | Accuracy<br>(1 $\delta$ ) | LOD <sup>a</sup><br>(1 $\delta$ ) | sampling<br>period                     |
|------------------------------|------------------------|---------------------------|-----------------------------------|----------------------------------------|
| NO, NO <sub>x</sub>          | chemiluminescence      | 10%                       | 25 pptV                           | Aug 10 <sup>th</sup> -27 <sup>th</sup> |
| O <sub>3</sub>               | UV photometry          | 5%                        | 0.3 ppbV                          | Aug 10 <sup>th</sup> -27 <sup>th</sup> |
| CO                           | IR photometry          | 5%                        | 10 ppbV                           | Aug 10 <sup>th</sup> -27 <sup>th</sup> |
| SO <sub>2</sub>              | pulsed<br>fluorescence | 5%                        | 50 pptV                           | Aug 10 <sup>th</sup> -27 <sup>th</sup> |
| C2-C10 NMHCs,<br>C2-C6 OVOCs | GC-MS/FID              | 10%                       | 10-50<br>pptV                     | Aug 10 <sup>th</sup> -27 <sup>th</sup> |
| HCHO                         | Hantszch               | 10%                       | 10 pptV                           | Aug 10 <sup>th</sup> -27 <sup>th</sup> |
| j-value                      | SR <sup>b</sup>        | 10%                       |                                   | Aug 10 <sup>th</sup> -27 <sup>th</sup> |

a. limit of detection;

b. spectral radiometer This type of SR measures J(O1D), J(NO<sub>2</sub>), J(HONO), J(H<sub>2</sub>O<sub>2</sub>), J(HCHO\_M), J(HCHO\_R), J(NO<sub>3</sub>\_M), J(NO<sub>3</sub>\_R)

Table S2 Performance of major photochemical instruments used in autumn 2014 in Heshan

| Parameter                    | Technique              | Accuracy<br>(1 $\delta$ ) | LOD<br>(1 $\delta$ ) | sampling<br>period                             |
|------------------------------|------------------------|---------------------------|----------------------|------------------------------------------------|
| NO, NO <sub>x</sub>          | chemiluminescence      | 10%                       | 25 pptV              | Oct 20 <sup>th</sup> -<br>Nov 22 <sup>nd</sup> |
| O <sub>3</sub>               | UV photometry          | 5%                        | 0.3 ppbV             | Oct 20 <sup>th</sup> -<br>Nov 22 <sup>nd</sup> |
| CO                           | IR photometry          | 5%                        | 10 ppbV              | Oct 20 <sup>th</sup> -<br>Nov 22 <sup>nd</sup> |
| SO <sub>2</sub>              | pulsed<br>fluorescence | 5%                        | 50 pptV              | Oct 20 <sup>th</sup> -<br>Nov 22 <sup>nd</sup> |
| C2-C10 NMHCs,<br>C2-C6 OVOCs | GC-MS/FID              | 10%                       | 10-50<br>pptV        | Oct 20 <sup>th</sup> -<br>Nov 22 <sup>nd</sup> |
| HCHO                         | Hantszch               | 10%                       | 10 pptV              | Oct 20 <sup>th</sup> -<br>Nov 22 <sup>nd</sup> |
| HONO                         | LOPAP <sup>a</sup>     | 10%                       | 10 pptV              | Oct 20 <sup>th</sup> -<br>Nov 22 <sup>nd</sup> |
| j-value                      | SR <sup>b</sup>        | 10%                       |                      | Oct 20 <sup>th</sup> -<br>Nov 22 <sup>nd</sup> |

a. Long-Path Absorption Photometry

b. This set of SR measures J(O1D), J(NO<sub>2</sub>), J(NO<sub>3</sub>\_R)

Table S3 Mean values of mixing ratios and reactivity of measured VOCs in Beijing 2013

| Species                | mean<br>mixing<br>ratios<br>(ppbV) | koH<br>(s <sup>-1</sup> ) | Species                    | mean<br>mixing<br>ratios<br>(ppbV) | koH<br>(s <sup>-1</sup> ) |
|------------------------|------------------------------------|---------------------------|----------------------------|------------------------------------|---------------------------|
| <i>Alkanes</i>         |                                    |                           | <i>Aromatics</i>           |                                    |                           |
| ethane                 | 4.55                               | 0.028                     | benzene                    | 1.01                               | 0.030                     |
| propane                | 4.31                               | 0.116                     | toluene                    | 3.74                               | 0.518                     |
| i-butane               | 1.90                               | 0.098                     | ethylbenzene               | 1.09                               | 0.188                     |
| n-butane               | 1.85                               | 0.104                     | styrene                    | 0.63                               | 0.900                     |
| acetylene              | 3.42                               | 0.084                     | m/p-xylene                 | 1.62                               | 0.754                     |
| cyclonepentane         | 0.09                               | 0.011                     | o-xylene                   | 0.58                               | 0.194                     |
| i-pentane              | 1.90                               | 0.168                     | n-propylbenzene            | 0.03                               | 0.004                     |
| n-pentane              | 1.45                               | 0.136                     | i-propylbenzene            | 0.02                               | 0.004                     |
| 2,2-dimethylbutane     | 0.06                               | 0.003                     | 3-ethyltoluene             | 0.09                               | 0.026                     |
| 2,3-dimethylbutane     | 0.09                               | 0.013                     | 4-ethyltoluene             | 0.06                               | 0.027                     |
| 2-methylpentane        | 0.58                               | 0.077                     | 1,3,5-<br>trimethylbenzene | 0.03                               | 0.042                     |
| 3-methylpentane        | 0.37                               | 0.047                     | 2-ethyltoluene             | 0.04                               | 0.018                     |
| n-hexane               | 0.43                               | 0.055                     | 1,2,4-<br>trimethylbenzene | 0.10                               | 0.080                     |
| 2,4-dimethylpentane    | 0.59                               | 0.069                     | 1,2,3-<br>trimethylbenzene | 0.03                               | 0.028                     |
| methylcyclopentane     | 0.19                               | 0.024                     | 1,3-diethylbenzen          | 0.01                               |                           |
| 2-methylhexane         | 0.25                               | 0.035                     | 1,4-diethylbenzene         | 0.02                               |                           |
| cyclohexane            | 0.12                               | 0.015                     | <i>OVOCs</i>               |                                    |                           |
| 2,3-dimethylpentane    | 0.18                               | 0.007                     | HCHO                       | 5.51                               | 1.153                     |
| 3-methylhexane         | 0.28                               | 0.039                     | acetaldehyde               | 2.43                               | 0.905                     |
| 2,3,4-trimethylpentane | 0.22                               | 0.036                     | acrolein                   | 0.02                               | 0.009                     |
| n-heptane              | 0.20                               | 0.033                     | propanal                   | 0.28                               | 0.139                     |
| methylcyclohexane      | 0.12                               | 0.015                     | acetone                    | 2.47                               | 0.010                     |
| 1,2-dimethylpropane    | 0.27                               | 0.034                     | MTBE                       | 0.10                               | -                         |
| 2,3,4-trimethylpropane | 0.10                               | 0.031                     | MACR                       | 0.10                               | 0.072                     |
| 2-methylheptane        | 0.04                               | 0.007                     | butanal                    | 0.10                               | 0.059                     |
| 3-methylheptane        | 0.04                               | 0.007                     | MVK                        | 0.08                               | 0.039                     |
| n-octane               | 0.07                               | 0.014                     | MEK                        | 0.67                               | 0.020                     |
| n-nonane               | 0.04                               | 0.010                     | 2-pentanone                | 0.02                               | 0.001                     |
| n-decane               | 0.03                               | 0.008                     | pentanal                   | 0.04                               | 0.028                     |
| n-undecane             | 0.02                               | 0.006                     | 3-pentanone                | 0.02                               | 0.002                     |
| n-dodecane             | 0.01                               | 0.003                     | MIBK                       | 0.02                               | 0.001                     |

|                       |      |        |                      |      |       |
|-----------------------|------|--------|----------------------|------|-------|
| <b><i>Alkenes</i></b> |      |        | hexanal              | 0.07 | 0.055 |
| ethene                | 2.94 | 0.617  | <b><i>Others</i></b> |      |       |
| propene               | 0.49 | 0.464  | acetonitrile         | 0.31 | 0.001 |
| t-2-butene            | 0.04 | 0.063  |                      |      |       |
| 1-butene              | 0.10 | 0.077  |                      |      |       |
| c-2-butene            | 0.06 | 0.084  |                      |      |       |
| 1-pentene             | 1.47 | 1.136  |                      |      |       |
| c-2-pentene           | 0.05 | 0.080  |                      |      |       |
| t-2-pentene           | 0.04 | 0.066  |                      |      |       |
| 1-hexene              | 0.02 | 0.018  |                      |      |       |
| isoprene              | 0.35 | 0.8617 |                      |      |       |

Table S4 Mean values of mixing ratios and reactivity of measured VOCs in Heshan 2014

| Species               | mean<br>mixing<br>ratios<br>(ppbV) | k <sub>OH</sub><br>(s <sup>-1</sup> ) | Species                    | mean<br>mixing<br>ratios<br>(ppbV) | k <sub>OH</sub><br>(s <sup>-1</sup> ) |
|-----------------------|------------------------------------|---------------------------------------|----------------------------|------------------------------------|---------------------------------------|
| <b><i>Alkanes</i></b> |                                    |                                       | <b><i>Aromatics</i></b>    |                                    |                                       |
| ethane                | 3.86                               | 0.023                                 | benzene                    | 1.01                               | 0.030                                 |
| propane               | 3.01                               | 0.081                                 | toluene                    | 3.74                               | 0.518                                 |
| i-butane              | 1.45                               | 0.075                                 | ethylbenzene               | 1.09                               | 0.188                                 |
| n-butane              | 1.85                               | 0.104                                 | styrene                    | 0.63                               | 0.900                                 |
| acetylene             | 3.42                               | 0.084                                 | m/p-xylene                 | 1.62                               | 0.754                                 |
| cyclonepentane        | 0.09                               | 0.011                                 | o-xylene                   | 0.58                               | 0.194                                 |
| i-pentane             | 1.90                               | 0.168                                 | n-propylbenzene            | 0.03                               | 0.004                                 |
| n-pentane             | 1.45                               | 0.136                                 | i-propylbenzene            | 0.02                               | 0.004                                 |
| 2,2-dimethylbutane    | 0.06                               | 0.003                                 | 3-ethyltoluene             | 0.09                               | 0.026                                 |
| 2,3-dimethylbutane    | 0.09                               | 0.013                                 | 4-ethyltoluene             | 0.06                               | 0.027                                 |
| 2-methylpentane       | 0.58                               | 0.077                                 | 1,3,5-<br>trimethylbenzene | 0.03                               | 0.042                                 |
| 3-methylpentane       | 0.37                               | 0.047                                 | 2-ethyltoluene             | 0.04                               | 0.018                                 |
| n-hexane              | 0.43                               | 0.055                                 | 1,2,4-<br>trimethylbenzene | 0.10                               | 0.080                                 |
| 2,4-dimethylpentane   | 0.59                               | 0.069                                 | 1,2,3-<br>trimethylbenzene | 0.03                               | 0.028                                 |
| methylcyclopentane    | 0.19                               | 0.024                                 | 1,3-diethylbenzen          | 0.01                               |                                       |
| 2-methylhexane        | 0.25                               | 0.035                                 | 1,4-diethylbenzene         | 0.02                               |                                       |
| cyclohexane           | 0.12                               | 0.015                                 | <b><i>OVOCs</i></b>        |                                    |                                       |

|                        |      |        |                      |      |       |
|------------------------|------|--------|----------------------|------|-------|
| 2,3-dimethylpentane    | 0.18 | 0.007  | HCHO                 | 5.51 | 1.153 |
| 3-methylhexane         | 0.28 | 0.039  | acetaldehyde         | 2.43 | 0.905 |
| 2,3,4-trimethylpentane | 0.22 | 0.036  | acrolein             | 0.02 | 0.009 |
| n-heptane              | 0.20 | 0.033  | propanal             | 0.28 | 0.139 |
| methylcyclohexane      | 0.12 | 0.015  | acetone              | 2.47 | 0.010 |
| 1,2-dimethylpropane    | 0.27 | 0.034  | MTBE                 | 0.10 | -     |
| 2,3,4-trimethylpropane | 0.10 | 0.031  | MACR                 | 0.03 | 0.072 |
| 2-methylheptane        | 0.04 | 0.007  | butanal              | 0.10 | 0.059 |
| 3-methylheptane        | 0.04 | 0.007  | MVK                  | 0.08 | 0.039 |
| n-octane               | 0.07 | 0.014  | MEK                  | 0.67 | 0.020 |
| n-nonane               | 0.04 | 0.010  | 2-pentanone          | 0.02 | 0.001 |
| n-decane               | 0.03 | 0.008  | pentanal             | 0.04 | 0.028 |
| n-undecane             | 0.02 | 0.006  | 3-pentanone          | 0.02 | 0.002 |
| n-dodecane             | 0.01 | 0.003  | MIBK                 | 0.43 | -     |
| <b><i>Alkenes</i></b>  |      |        | hexanal              | 0.07 | 0.055 |
| ethene                 | 2.94 | 0.617  | <b><i>Others</i></b> |      |       |
| propene                | 0.49 | 0.464  | acetonitrile         | 0.31 | 0.001 |
| t-2-butene             | 0.04 | 0.063  |                      | 0.02 | 0.001 |
| 1-butene               | 0.10 | 0.077  |                      | 0.07 | 0.055 |
| c-2-butene             | 0.06 | 0.084  |                      | 0.38 | -     |
| 1-pentene              | 1.47 | 1.136  |                      |      |       |
| c-2-pentene            | 0.05 | 0.080  |                      | 0.31 | 0.001 |
| t-2-pentene            | 0.04 | 0.066  |                      |      |       |
| 1-hexene               | 0.02 | 0.018  |                      |      |       |
| isoprene               | 0.35 | 0.8617 |                      |      |       |

Table S5 Major contributors to modeled reactivity compared with calculated reactivity contributions in PKU, 2013.

| Species  | $k_{cal} (s^{-1})$ | $k_{mod} (s^{-1})$ |
|----------|--------------------|--------------------|
| ALD*     | 1.37               | 2.3                |
| HCHO     | --                 | 1.31               |
| GLY+MGLY | --                 | 0.38               |
| ISOP     | --                 | 0.31               |
| DCB      | --                 | 0.21               |

\*: ALD: C3 and higher aldehydes.

GLY: glyoxal, MGLY: methyl glyoxal.

ISOP: peroxy radicals formed from reactions between isoprene and OH radicals

DCB: unsaturated dicarbonyls

The acronyms in Table S6 are the same as in Table S5

Table S6 Major contributors to modeled reactivity compared with calculated reactivity contributions in Heshan, 2014.

| Species  | $k_{\text{cal}} (\text{s}^{-1})$ | $k_{\text{mod}} (\text{s}^{-1})$ |
|----------|----------------------------------|----------------------------------|
| ALD      | 1.09                             | 1.75                             |
| HCHO     | --                               | 1.21                             |
| GLY+MGLY | --                               | 0.77                             |
| ISOP     | --                               | 0.68                             |
| DCB      | --                               | 0.68                             |

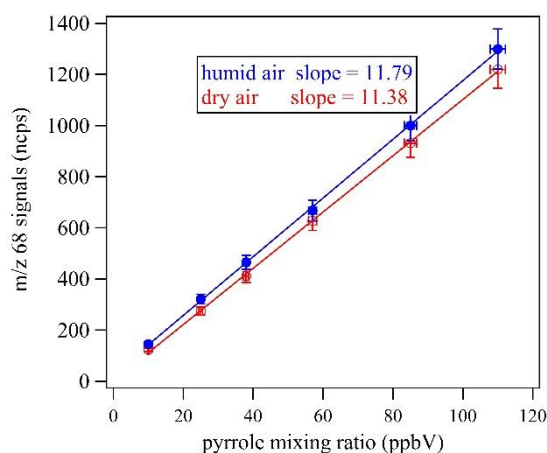

Fig S1 Calibration curve of pyrrole in PTR-MS

(blue lines and points: pyrrole diluted by humidified synthetic air; red lines and points: pyrrole diluted by dry synthetic air)

Error bars: estimated uncertainties from measured and calculated uncertainties of pyrrole

#### Humidity corrections for CRM

For the interference tests, the systems are set in the C2 mode. First, the needle valve in the synthetic air pathway is turned off to obtain a signal for the lower relative humidity (RH) situation. Then the valve is switched on and on to provide different RH situations. The pyrrole signals vary with the changes of RH, which is quantified by the ratios of m/z 39 to m/z 21. Then the curve is fit by the spots observed as in Fig S2.

In the ambient measurements, the fitting curve is used to correct the difference in RH between C2 mode and C3 mode.

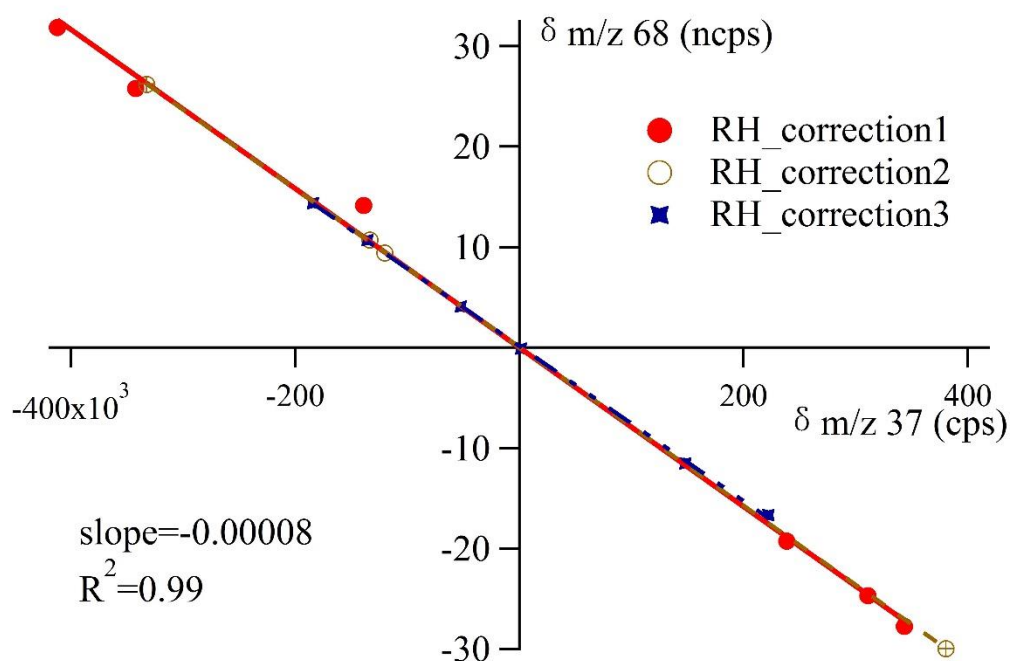

Fig S2. Variation in the pyrrole signal ( $m/z 68$ ) with variations of relative humidity. The x axis represents the difference in  $m/z 37$  signals between C2 and C3 mode, and the y axis represents the difference in normalized  $m/z 68$  signals between C2 and C3 mode. We found a good correlation between these two series of data if we change the valve to set different relative humidity for the experiment. And this fitting results could be used to adjust the humidity influence on pyrrole during ambient measurements.
